# Supplementary material for: Modeling the Adoption of Innovations in the Presence of Geographic and Media Influences
Source: PLoS One. 2012 Jan 19;7(1):e29528. doi: 10.1371/journal.pone.0029528 (PMC3261844; doi:10.1371/journal.pone.0029528)
Supplement: Dataset S1 — A dataset containing city level composition data as well as time series of weekly adoption. For each of the 408 cities used as input in our model, we have included data such as the percentage of early adopters, the total population of Twitter users, and weekly time series of new users. (XLS) [file pone.0029528.s003.xls]

## Sheet: city_names
Abilene,TX
Akron,OH
Albany,NY
Albright,WV
Albuquerque,NM
Alexandria,VA
Allentown,PA
Alpharetta,GA
Amarillo,TX
Ames,IA
Amsouth-Bank,TN
Anaheim,CA
Anchorage,AK
Anderson,SC
Ann-Arbor,MI
Annapolis,MD
Appleton,WI
Arlington,TX
Arlington,VA
Asheville,NC
Athens,OH
Athens-Clarke-County,GA
Atlanta,GA
Auburn,AL
Augusta,GA
Aurora,CO
Austin,TX
Bailey,CO
Bakersfield,CA
Baltimore,MD
Baton-Rouge,LA
Bayville,NJ
Beaumont,TX
Beaverton,OR
Bellevue,WA
Bellingham,WA
Bend,OR
Berkeley,CA
Bethesda,MD
Bethlehem,PA
Beverly-Hills,CA
Billings,Mt
Biloxi,MS
Birmingham,AL
Blacksburg,VA
Bloomington,IN
Bluefield,VA
Boca-Raton,FL
Boise,ID
Boston,MA
Boulder,CO
Bowling-Green,KY
Bozeman,Mt
Bradenton,FL
Bronx,NY
Brooklyn,NY
Buffalo,NY
Burbank,CA
Cambridge,MA
Canton,OH
Cape-Coral,FL
Carlsbad,CA
Cary,NC
Cedar-Rapids,IA
Champaign,IL
Chandler,AZ
Chapel-Hill,NC
Charleston,SC
Charleston,WV
Charlotte,NC
Charlottesville,VA
Chattanooga,TN
Chesapeake,VA
Cheshire,CT
Chesterland,OH
Chicago,IL
Chico,CA
Cincinnati,OH
Clarksville,TN
Clearwater,FL
Cleveland,GA
Cleveland,OH
College-Park,GA
College-Station,TX
Colorado-Springs,CO
Columbia,MO
Columbia,NC
Columbia,SC
Columbus,GA
Columbus,OH
Computer-Com-of-Amer,DE
Conway,AR
Coral-Springs,FL
Corpus-Christi,TX
Corvallis,OR
Costa-Mesa,CA
Dallas,TX
Davis,CA
Dayton,OH
Decatur,GA
Denton,TX
Denver,CO
Des-Moines,IA
Detroit,MI
Duluth,MN
Durango,CO
Durham,NC
East-Lansing,MI
Easton,PA
El-Paso,TX
Elk-City,OK
Elk-Grove,CA
England,AR
Eugene,OR
Evanston,IL
Evansville,IN
Everett,WA
Fairfax,VA
Fayetteville,AR
Fayetteville,NC
Flint,MI
Forks,WA
Fort-Collins,CO
Fort-Lauderdale,FL
Fort-Myers,FL
Fort-Wayne,IN
Fort-Worth,TX
Franklin,TN
Frederick,MD
Fredericksburg,VA
Fremont,CA
Fresno,CA
Frisco,TX
Fullerton,CA
Gainesville,FL
Garland,TX
Gilbert,AZ
Glendale,AZ
Glendale,CA
Grand-Prairie,TX
Grand-Rapids,MI
Greeley,CO
Green-Bay,WI
Greensboro,NC
Greentown,PA
Greenville,NC
Greenville,SC
Gresham,OR
Hamilton,OH
Harrisburg,PA
Hartford,CT
Hattiesburg,MS
Hayward,CA
Heart-Butte,Mt
Hebron,KY
Henderson,NV
Hoboken,NJ
Hollywood,FL
Holtsville,NY
Honolulu,HI
Hope,NY
Houston,TX
Huntington,WV
Huntington-Beach,CA
Huntsville,AL
Indianapolis,IN
Iowa-City,IA
Irvine,CA
Irving,TX
Ithaca-College,NY
Jackson,MS
Jacksonville,FL
Jacksonville,NC
Jeffersonton,VA
Jersey-City,NJ
Jersey-Shore,PA
Johnson-City,TN
Joliet,IL
Jupiter,FL
Kalamazoo,MI
Kansas-Bank-Amer,KS
Kansas-City,KS
Kansas-City,MO
Katy,TX
Kennesaw,GA
Kent,WA
Killeen,TX
Kissimmee,FL
Knoxville,TN
Kula,HI
Lafayette,IN
Lafayette,LA
Laguna-Beach,CA
Lake-Charles,LA
Lakeland,FL
Lancaster,PA
Lansing,MI
Laredo,TX
Las-Cruces,NM
Las-Vegas,NV
Lawrence,KS
Lawrenceville,GA
Leavenworth-Lake-Wenatchee,WA
Lexington,KY
Lexington,OK
Lincoln,NE
Little-Rock,AR
Littleton,CO
Livermore,CA
Long-Beach,CA
Los-Angeles,CA
Louisville,KY
Loveland,OH
Lubbock,TX
Lynchburg,VA
Macon,GA
Madison,WI
Malibu,CA
Manchester,NH
Manhattan,KS
Marietta,GA
Marion,IN
McAllen,TX
McKinney,TX
Melbourne,FL
Melbourne,IA
Memphis,TN
Mesa,AZ
Miami,FL
Miami-Beach,FL
Midland,TX
Midwest,WY
Millersville,MD
Milwaukee,WI
Minneapolis,MN
Missoula,Mt
Mobile,AL
Modesto,CA
Monongahela,PA
Montgomery,AL
Morgantown,WV
Mountain-View,CA
Muncie,IN
Murfreesboro,TN
Murrieta,CA
Myrtle-Beach,SC
Napa,CA
Naperville,IL
Naples,FL
New-Brunswick,NJ
New-Haven,CT
New-Orleans,LA
New-Ringgold,PA
New-York,NY
Newark,DE
Newark,IL
Newark,NJ
Newfoundland,PA
Newport-Beach,CA
Newport-News,VA
Nokesville,VA
Norman,OK
North-Hollywood,CA
Oakland,CA
Ocala,FL
Oceanside,CA
Oklahoma-City,OK
Olathe,KS
Olympia,WA
Omaha,NE
Orange,CA
Orange,TX
Orangeville,UT
Orlando,FL
Overland-Park,KS
Palm-Beach,FL
Palm-Springs,CA
Palmdale,CA
Palo-Alto,CA
Panama-City,FL
Pasadena,CA
Pensacola,FL
Peoria,AZ
Peoria,IL
Petaluma,CA
Philadelphia,PA
Philippi,WV
Phoenix,AZ
Piatt,PA
Pinckney,MI
Pittsburgh,PA
Plano,TX
Pollok,TX
Portland,ME
Portland,OR
Portola,CA
Prosper,TX
Providence,RI
Provo,UT
Puyallup,WA
Queens,NY
Raleigh,NC
Rancho-Cucamonga,CA
Reading,PA
Redding,CA
Redondo-Beach,CA
Reno,NV
Reston,VA
Richmond,VA
Riverside,CA
Roanoke,VA
Rochester,MN
Rochester,NY
Rockford,IL
Roseville,CA
Round-Rock,TX
Sacramento,CA
Salem,OR
Salt-Lake-City,UT
San-Antonio,TX
San-Bernardino,CA
San-Buenaventura-(Ventura),CA
San-Clemente,CA
San-Diego,CA
San-Francisco,CA
San-Jose,CA
San-Luis-Obispo,CA
San-Marcos,TX
San-Mateo,CA
Santa-Barbara,CA
Santa-Clara,CA
Santa-Clarita,CA
Santa-Cruz,CA
Santa-Fe,NM
Santa-Monica,CA
Santa-Rosa,CA
Sarasota,FL
Savannah,GA
Scottsdale,AZ
Scranton,PA
Seattle,WA
Shreveport,LA
Siloam-Springs,AR
Silver-Spring,MD
Simi-Valley,CA
Sioux-Falls,SD
Somerville,MA
South-Bend,IN
Spartanburg,SC
Spokane,WA
Springfield,IL
Springfield,MO
St-Augustine,FL
St-Louis,MO
St-Paul,MN
St-Petersburg,FL
St-Stephen,SC
Stamford,CT
State-College,PA
Staten-Island,NY
Stillwater,OK
Stilwell,OK
Stockton,CA
Sugar-Land,TX
Sunnyvale,CA
Surprise,AZ
Syracuse,NY
Tacoma,WA
Tallahassee,FL
Tampa,FL
Temecula,CA
Tempe,AZ
Thousand-Oaks,CA
Toledo,OH
Topeka,KS
Torrance,CA
Traverse-City,MI
Tucson,AZ
Tulsa,OK
Tuscaloosa,AL
Tustin,CA
Tyler,TX
Upper-Marlboro,MD
Valdosta,GA
Vallejo,CA
Vancouver,WA
Venice,CA
Virginia-Beach,VA
Visalia,CA
Waco,TX
Washington,DC
West-Chester,PA
West-Cornwall,CT
West-Hollywood,CA
West-Lafayette,IN
West-Palm-Beach,FL
Whittier,CA
Williamsburg,VA
Wilmington,DE
Wilmington,NC
Winchester,VA
Winston-Salem,NC
Winter-Park,FL
Woodbridge,VA
Woonsocket,RI
Worcester,MA
Yonkers,NY
Young,AZ

## Sheet: lat_lon
32.449	-99.733
41.081	-81.519
42.653	-73.756
39.597	-79.617
35.084	-106.65
38.805	-77.047
40.608	-75.49
34.075	-84.294
35.222	-101.83
42.023	-93.626
36.166	-86.784
33.811	-117.92
61.218	-149.9
34.503	-82.65
42.271	-83.726
38.978	-76.492
44.262	-88.415
32.736	-97.108
38.89	-77.084
35.601	-82.554
39.329	-82.101
33.961	-83.378
33.749	-84.388
32.61	-85.481
33.471	-81.975
39.729	-104.83
30.267	-97.743
39.55	-105.78
35.373	-119.02
39.29	-76.612
30.451	-91.155
39.904	-74.192
29.956	-94.022
45.487	-122.8
47.61	-122.2
48.76	-122.49
44.058	-121.32
37.872	-122.27
38.981	-77.1
40.626	-75.37
34.074	-118.4
45.783	-108.5
30.396	-88.885
33.521	-86.802
37.224	-80.427
39.165	-86.526
37.223	-81.45
26.359	-80.083
43.613	-116.21
42.358	-71.06
40.015	-105.27
36.99	-86.444
45.683	-111.05
27.423	-82.581
40.837	-73.865
40.65	-73.95
42.886	-78.878
34.181	-118.31
42.375	-71.106
40.799	-81.378
26.563	-81.95
33.158	-117.35
35.792	-78.781
41.963	-91.692
40.116	-88.243
33.306	-111.84
35.913	-79.056
32.777	-79.931
38.35	-81.633
35.227	-80.843
38.029	-78.477
35.046	-85.31
36.819	-76.275
41.499	-72.901
41.523	-81.362
41.85	-87.65
39.728	-121.84
39.148	-84.477
36.558	-87.344
27.966	-82.8
34.654	-83.801
41.499	-81.695
33.64	-84.444
30.628	-96.334
38.834	-104.82
38.952	-92.334
35.948	-76.13
34.001	-81.035
32.461	-84.988
39.961	-82.999
39.746	-75.547
35.089	-92.442
26.271	-80.271
27.801	-97.396
44.565	-123.26
33.641	-117.92
32.803	-96.77
38.545	-121.74
39.747	-84.167
33.775	-84.296
33.215	-97.133
39.739	-104.98
41.601	-93.609
42.331	-83.046
46.783	-92.107
37.37	-108.07
36.112	-78.865
42.737	-84.484
40.688	-75.221
31.759	-106.49
35.364	-99.523
38.409	-121.37
34.544	-91.969
44.052	-123.09
42.041	-87.69
37.975	-87.556
47.979	-122.2
38.846	-77.306
36.063	-94.157
35.053	-78.878
43.013	-83.687
47.909	-124.64
40.585	-105.08
26.122	-80.143
26.641	-81.872
41.131	-85.129
32.725	-97.321
35.925	-86.869
39.414	-77.411
38.303	-77.461
37.548	-121.99
36.748	-119.77
33.151	-96.824
33.87	-117.93
29.652	-82.325
32.913	-96.639
33.353	-111.79
33.539	-112.19
34.143	-118.26
32.746	-96.998
42.963	-85.668
40.404	-104.7
44.519	-88.02
36.09	-79.83
41.314	-75.211
35.613	-77.366
34.853	-82.394
45.498	-122.43
39.4	-84.561
40.274	-76.884
41.764	-72.685
31.327	-89.29
37.669	-122.08
48.247	-112.81
39.084	-84.723
36.104	-114.94
40.744	-74.032
26.011	-80.149
40.817	-73.066
21.307	-157.86
43.299	-74.218
29.763	-95.363
38.419	-82.445
33.66	-118
34.73	-86.586
39.767	-86.156
41.661	-91.53
33.712	-117.79
32.898	-97.04
42.441	-76.497
32.299	-90.185
30.332	-81.656
34.754	-77.43
38.664	-77.926
40.728	-74.078
41.202	-77.264
36.287	-82.365
41.525	-88.082
26.934	-80.094
42.292	-85.587
37.692	-97.338
39.13	-94.63
39.1	-94.579
29.786	-95.824
34.023	-84.615
47.381	-122.23
31.117	-97.728
28.292	-81.408
35.961	-83.921
20.798	-156.33
40.417	-86.875
30.224	-92.02
33.542	-117.78
30.227	-93.217
28.039	-81.95
40.038	-76.306
42.733	-84.556
27.506	-99.508
32.312	-106.78
36.115	-115.17
38.972	-95.235
33.956	-83.988
47.751	-120.74
37.989	-84.478
35.008	-97.093
40.807	-96.682
34.746	-92.29
39.613	-105.02
37.804	-121.81
33.767	-118.19
34.052	-118.24
38.254	-85.759
39.269	-84.264
33.578	-101.86
37.414	-79.142
32.841	-83.632
43.073	-89.401
34.005	-118.81
42.996	-71.455
39.2	-96.581
33.953	-84.55
40.551	-85.602
26.203	-98.23
33.198	-96.615
28.084	-80.608
41.878	-93.098
35.15	-90.049
33.422	-111.82
25.774	-80.194
25.791	-80.13
31.952	-102.17
43.411	-106.28
39.046	-76.641
43.039	-87.906
44.98	-93.264
46.872	-113.99
30.694	-88.043
37.639	-121
40.193	-79.916
32.367	-86.3
39.63	-79.956
37.386	-122.08
40.193	-85.386
35.846	-86.39
33.554	-117.21
33.636	-78.965
38.305	-122.29
41.786	-88.147
26.142	-81.795
40.486	-74.452
41.308	-72.928
29.955	-90.075
40.702	-75.876
40.783	-73.966
39.684	-75.75
41.474	-88.434
40.736	-74.172
41.278	-75.367
33.619	-117.93
36.979	-76.428
38.682	-77.507
35.223	-97.439
34.172	-118.38
37.804	-122.27
29.187	-82.14
33.196	-117.38
35.468	-97.516
38.881	-94.819
47.038	-122.9
41.254	-95.999
33.788	-117.85
30.278	-93.785
39.321	-111.09
28.538	-81.379
38.982	-94.671
26.706	-80.036
33.83	-116.55
34.579	-118.12
37.442	-122.14
30.159	-85.66
34.148	-118.14
30.421	-87.217
33.581	-112.24
40.694	-89.589
38.232	-122.64
39.952	-75.164
39.144	-80.001
33.448	-112.07
41.203	-77.195
42.435	-83.985
40.441	-79.996
33.02	-96.699
31.427	-94.809
43.661	-70.255
45.523	-122.68
39.789	-120.54
33.241	-96.782
41.824	-71.413
40.234	-111.66
47.185	-122.29
40.766	-73.833
35.772	-78.639
34.106	-117.59
40.336	-75.927
40.587	-122.39
33.849	-118.39
39.53	-119.81
38.969	-77.341
37.543	-77.469
33.953	-117.4
37.271	-79.941
44.022	-92.47
43.159	-77.635
42.271	-89.094
38.752	-121.29
30.508	-97.679
38.582	-121.49
44.943	-123.04
40.761	-111.89
29.424	-98.494
34.127	-117.34
34.278	-119.29
33.427	-117.61
32.715	-117.16
37.775	-122.42
37.339	-121.89
35.283	-120.66
29.89	-97.939
37.563	-122.33
34.421	-119.7
37.354	-121.96
34.392	-118.54
36.974	-122.03
35.687	-105.94
34.019	-118.49
38.44	-122.71
27.336	-82.531
32.084	-81.1
33.509	-111.9
41.409	-75.662
47.606	-122.33
32.525	-93.75
36.177	-94.529
38.991	-77.026
34.269	-118.78
43.55	-96.7
42.388	-71.099
41.683	-86.25
34.95	-81.932
47.659	-117.43
39.802	-89.644
37.215	-93.298
29.895	-81.315
38.627	-90.198
44.944	-93.093
27.771	-82.679
33.43	-79.954
41.053	-73.539
40.793	-77.86
40.583	-74.15
36.116	-97.058
35.885	-94.668
37.958	-121.29
29.62	-95.635
37.369	-122.04
33.631	-112.33
43.048	-76.147
47.253	-122.44
30.438	-84.281
27.948	-82.458
33.494	-117.15
33.415	-111.91
34.184	-118.91
41.664	-83.555
39.048	-95.678
33.836	-118.34
44.763	-85.621
32.222	-110.93
36.154	-95.993
33.209	-87.547
33.717	-117.83
32.351	-95.301
38.793	-76.791
30.833	-83.278
38.104	-122.26
45.639	-122.66
33.991	-118.46
36.827	-76.16
36.33	-119.29
31.549	-97.147
38.941	-77.011
39.961	-75.605
41.844	-73.329
34.09	-118.36
40.426	-86.908
26.715	-80.053
33.979	-118.03
37.271	-76.707
39.819	-75.49
34.226	-77.945
39.186	-78.163
36.1	-80.244
28.6	-81.339
38.658	-77.25
42.004	-71.508
42.263	-71.802
40.931	-73.899
34.049	-111.09

## Sheet: google_search
0
0
0
0
0
0
0
0
0
0
0
0
0
0
0
0
0
0
0
0
0
0
0
0
0
0
0
0
0
0
0
0
0
0
0
0
0
0
0
0
0
0
0
0
0
0
0
0
0
0
0
1
2
2
1
1
1
2
1
1
1
1
1
1
1
1
1
1
1
1
1
1
1
1
1
1
1
1
1
1
1
1
1
1
1
1
1
1
1
1
1
1
1
2
1
1
1
1
2
2
2
2
2
3
3
3
3
3
4
5
5
4
5
5
5
5
5
4
5
4
5
5
7
5
5
6
5
6
6
6
7
6
6
6
6
7
10
10
9
9
11
11
11
11
12
12
17
15
19
18
22
23
30
36
44
51
58
72
72
71
92
91
81
72
69
68
72
73
74
98
99
87
88
86
87
87
100
87
83
84

## Sheet: google_news
0
0
0
0
0
0
0
0
0
0
0
0
0
0
0
0
0
0
0
0
0
0
0
0
0
0
0
0
0
0
0
0
0
0
0
0
0
0
0
0
0
0
0
0
0
0
0
0
0
0
0
0
0
0
0
0
0
0
0
0
0
0
0
0
0
0
0
0
0
0
0
0
0
0
0
0
0
0
0
0
0
0
0
0
0
0
0
0
0
0
0
0
0
0
0
0
0
0
0
0
0
0
1
1
0
0
0
0
1
1
1
0
1
1
1
1
1
1
1
1
1
1
1
1
1
0
0
1
1
0
1
1
1
1
1
1
2
3
5
3
5
5
3
4
9
8
12
9
6
6
7
8
12
16
20
20
21
29
31
27
44
39
26
25
25
21
28
31
33
63
44
35
34
39
39
41
100
51
68
67

## Sheet: crit_mass_ach_times
147
138
138
147
142
131
143
135
151
125
134
144
138
132
121
138
132
147
130
132
131
134
138
131
148
144
123
140
146
142
147
142
152
128
124
129
133
114
124
146
147
145
148
147
123
128
126
138
133
130
120
148
130
144
155
138
142
135
111
146
148
136
125
134
134
136
127
137
131
142
130
139
143
151
151
138
133
144
150
144
154
139
151
142
140
133
152
148
153
134
139
139
137
151
124
132
140
125
148
144
139
136
129
149
140
147
133
132
139
153
151
148
152
128
124
146
140
130
142
151
150
158
133
144
149
143
144
127
137
132
131
146
138
133
138
149
142
146
141
151
129
144
143
145
146
148
134
139
149
137
143
150
145
147
149
132
128
148
144
134
141
146
147
141
139
140
133
131
142
120
153
146
151
151
141
148
137
143
149
139
140
144
138
148
142
151
155
151
135
140
140
145
140
153
146
143
132
153
142
146
132
138
139
141
150
139
143
137
122
150
137
141
147
150
136
148
126
146
139
133
138
142
150
140
141
141
146
141
150
138
146
130
140
138
124
130
150
149
146
149
141
101
137
139
145
147
137
138
141
146
135
147
150
142
140
135
152
149
140
149
150
141
139
126
151
145
142
133
135
138
136
147
132
139
133
150
144
151
103
146
129
144
145
142
139
139
150
139
146
147
139
139
136
129
117
153
150
141
129
145
149
133
145
149
144
131
135
123
139
145
143
129
134
142
141
127
140
139
127
145
146
137
142
136
110
126
133
136
114
129
122
136
122
134
122
133
138
146
138
142
121
151
148
130
140
135
106
139
143
138
138
140
141
138
129
141
142
134
126
145
137
151
151
143
113
142
140
140
142
142
145
131
138
147
140
140
143
141
138
147
135
147
153
151
152
137
116
145
151
147
132
141
150
132
129
147
151
135
151
139
143
151
131
148
137
143
153
145

## Sheet: city_type_comp
0.069329	0.10006	0.10368	0.073864	0.090594	0.13346	0.08394	0.11404	0.06	0.15105	0.11738	0.082149	0.10829	0.12932	0.17669	0.10536	0.12579	0.072884	0.14386	0.12591	0.12675	0.11529	0.10059	0.13217	0.06268	0.080287	0.17144	0.10516	0.070497	0.085196	0.070969	0.077703	0.057677	0.14244	0.1628	0.1409	0.11906	0.19925	0.16225	0.072095	0.068799	0.091258	0.069942	0.070384	0.17082	0.14891	0.16101	0.10677	0.12141	0.13532
[truncated: 206 more columns]

## Sheet: total_users_per_city
1327	3128	4022	1232	7495	4076	2061	1517	2250	1238	23027	3518	3463	1013	6033	2164	1113	6970	1571	3852	1073	3244	76887	1725	3478	1532	45719	3119	3220	22231	7299	1184	1283	1383	2199	2484	1831	4808	1208	1179	1657	1041	1201	15870	1405	2102	3739	1920	5708	56902
[truncated: 206 more columns]

## Sheet: time_series_week
0	0	0	0	0	0	0	0	0	0	0	0	0	0	0	0	0	0	0	0	0	0	0	0	0	0	0	0	0	0	0	0	0	0	0	0	0	1	0	0	0	0	0	0	0	0	0	0	0	0
0	0	0	0	0	0	0	0	0	0	0	0	0	0	0	0	0	0	0	0	0	0	0	0	0	0	0	0	0	0	0	0	0	0	0	0	0	0	0	0	0	0	0	0	0	1	0	0	0	0
0	0	0	0	0	0	0	0	0	0	0	0	0	0	0	0	0	0	0	0	0	0	0	0	0	0	0	0	0	0	0	0	0	0	0	0	0	0	0	0	0	0	0	0	0	0	0	0	0	0
0	0	0	0	0	0	0	0	0	0	0	0	0	0	0	0	0	0	0	0	0	0	0	0	0	0	0	0	0	0	0	0	0	0	0	0	0	0	0	0	0	0	0	0	0	0	0	0	0	0
0	0	0	0	0	0	0	0	0	0	0	0	0	0	0	0	0	0	0	0	0	0	0	0	0	0	0	0	0	0	0	0	0	0	0	0	0	0	0	0	0	0	0	0	0	0	0	0	0	0
0	0	0	0	0	0	0	0	0	0	0	0	0	0	0	0	0	0	0	0	0	0	0	0	0	0	0	0	0	0	0	0	0	0	0	0	0	0	0	0	0	0	0	0	0	0	0	0	0	1
0	0	0	0	0	0	0	0	0	0	0	0	0	0	0	0	0	0	0	0	0	0	0	0	0	0	0	0	0	0	0	0	0	0	0	0	0	0	0	0	0	0	0	0	0	0	0	0	0	0
0	0	0	0	0	0	0	0	0	0	0	0	0	0	0	0	0	0	0	0	0	0	0	0	0	0	0	0	0	0	0	0	0	0	0	0	0	0	0	0	0	0	0	0	0	0	0	0	0	0
0	0	0	0	0	0	0	0	0	0	0	0	0	0	0	0	0	0	0	0	0	0	0	0	0	0	0	0	0	0	0	0	0	0	0	0	0	0	0	0	0	0	0	0	0	0	0	0	0	0
0	0	0	0	0	0	0	0	0	0	0	0	0	0	0	0	0	0	0	0	0	0	0	0	0	0	0	0	0	0	0	0	0	0	0	0	0	0	0	0	0	0	0	0	0	0	0	0	0	0
0	0	0	0	0	0	0	0	0	0	0	0	0	0	0	0	0	0	0	0	0	0	0	0	0	0	0	0	0	0	0	0	0	0	0	0	0	0	0	0	0	0	0	0	0	0	0	0	0	0
0	0	0	0	0	0	0	0	0	0	0	0	0	0	0	0	0	0	0	0	0	0	0	0	0	0	0	0	0	0	0	0	0	0	0	0	0	0	0	0	0	0	0	0	0	0	0	0	0	0
0	0	0	0	0	0	0	0	0	0	0	0	0	0	0	0	0	0	0	0	0	0	0	0	0	0	0	0	0	0	0	0	0	0	0	0	0	0	0	0	0	0	0	0	0	0	0	0	0	0
0	0	0	0	0	0	0	0	0	0	0	0	0	0	0	0	0	0	0	0	0	0	0	0	0	0	0	0	0	0	0	0	0	0	0	0	0	0	0	0	0	0	0	0	0	0	0	0	0	1
0	0	0	0	0	0	0	0	0	0	0	0	0	0	0	0	0	0	0	0	0	0	0	0	0	0	0	0	0	0	0	0	0	0	0	0	0	0	0	0	0	0	0	0	0	0	0	0	0	0
0	0	0	0	0	0	0	0	0	0	0	0	0	0	0	0	0	0	0	0	0	0	0	0	0	0	0	0	0	0	0	0	0	0	0	0	0	0	0	0	0	0	0	0	0	0	0	0	0	0
0	1	0	0	1	2	0	0	0	0	2	0	0	0	2	0	0	1	0	0	0	0	3	0	1	0	5	0	1	0	0	0	0	1	0	0	0	1	0	0	0	0	0	2	0	0	0	1	0	7
0	0	0	0	0	0	0	0	0	0	0	0	0	0	0	0	0	0	0	0	0	0	0	0	0	0	0	0	0	0	0	0	0	0	0	0	0	0	0	0	0	0	0	0	0	0	0	0	0	2
0	0	0	0	0	0	0	0	0	0	0	0	0	0	0	0	0	0	0	1	0	0	0	0	0	0	2	0	0	0	0	0	0	0	0	0	0	1	0	0	0	0	0	0	0	0	0	0	0	0
0	0	0	0	0	0	0	0	0	0	0	0	0	0	0	0	0	0	0	0	0	0	1	0	0	0	1	0	0	0	0	0	0	0	0	0	0	1	1	0	0	0	0	0	0	0	0	0	0	0
0	0	0	0	0	0	0	0	0	0	0	0	0	0	0	0	0	0	0	0	0	0	0	0	0	0	0	0	0	0	0	0	0	0	0	0	0	0	0	0	0	0	0	0	0	0	0	0	0	0
0	0	0	0	0	0	0	0	0	0	0	0	0	0	0	0	0	0	0	0	0	0	1	0	0	0	1	0	0	2	0	0	0	0	0	0	0	0	0	0	0	0	0	0	0	0	0	0	0	1
0	0	0	0	0	0	0	0	0	0	0	0	0	0	0	0	0	0	0	0	0	0	0	0	0	0	1	0	0	0	0	0	0	0	0	0	0	1	0	0	0	0	0	0	0	0	0	0	0	1
0	0	0	0	0	0	0	0	0	0	0	0	0	0	0	0	0	0	0	0	0	0	0	0	0	0	2	0	0	0	0	0	0	0	0	0	0	0	0	0	0	0	0	0	0	0	0	0	0	4
0	0	0	0	0	0	0	0	0	0	0	0	0	0	0	0	0	0	0	0	0	0	1	0	0	0	0	0	0	0	0	0	0	0	0	0	0	1	0	0	0	0	0	0	0	0	0	0	0	2
0	0	0	0	0	0	0	0	0	0	1	0	0	0	0	0	0	0	0	0	0	0	1	0	0	0	0	0	0	2	0	0	0	0	1	0	0	0	0	0	1	0	0	0	0	0	0	0	0	0
0	0	0	0	0	0	0	0	0	0	0	0	0	0	0	0	0	0	0	0	0	0	0	0	0	0	0	0	0	0	1	0	0	0	0	1	0	0	0	0	0	0	0	0	0	0	0	0	0	3
0	0	0	0	0	0	0	0	0	0	0	0	0	0	0	0	0	0	0	0	0	0	0	0	0	0	0	0	0	0	0	0	0	0	0	0	0	0	0	0	0	0	0	0	0	0	1	0	0	0
0	0	2	0	0	0	0	0	0	0	0	0	0	0	0	0	0	0	0	0	0	0	1	0	0	0	0	0	1	0	0	0	0	0	0	0	0	0	0	0	0	0	0	0	0	0	0	0	0	0
0	0	0	0	0	0	0	0	0	0	1	0	0	0	1	0	0	0	0	0	0	0	2	0	0	0	2	0	0	0	0	0	0	0	0	0	0	0	0	0	0	0	0	0	0	0	0	0	0	0
0	0	0	0	0	1	0	0	0	0	0	0	1	0	2	0	0	0	0	0	0	0	0	1	1	0	0	0	0	2	0	0	0	0	0	0	0	0	1	0	0	0	0	0	0	0	0	0	1	9
0	0	1	0	0	1	0	1	0	1	0	0	0	0	1	0	0	0	0	1	0	0	2	0	0	0	1	0	0	0	0	0	0	0	0	1	0	0	0	0	0	0	0	0	0	0	0	0	1	3
0	0	0	0	0	0	0	0	0	0	0	0	0	0	1	0	0	0	0	0	0	0	0	0	0	0	0	0	0	0	0	0	0	0	1	0	0	2	0	0	0	0	0	0	0	1	0	0	0	1
0	0	0	0	0	0	0	0	0	0	0	0	0	0	0	0	0	0	0	0	0	0	1	0	0	0	1	0	0	1	0	0	0	0	0	0	0	1	0	0	0	0	0	0	0	0	0	0	0	1
0	0	0	0	1	0	0	0	0	1	1	0	0	0	0	0	0	1	0	2	0	0	6	0	0	0	5	0	1	0	0	0	0	0	2	0	0	3	1	0	0	0	0	1	0	0	0	0	0	7
0	0	0	0	1	0	0	1	0	1	0	0	0	0	0	0	0	0	0	1	0	0	5	0	0	0	6	0	2	1	0	0	0	0	0	0	0	0	1	0	0	1	0	0	0	0	0	0	0	6
0	1	0	0	0	1	0	0	0	1	2	0	0	0	1	0	0	1	0	0	0	0	3	0	0	0	7	1	0	1	1	0	0	0	0	1	0	0	0	0	0	0	0	0	0	0	1	0	0	3
0	0	0	0	1	0	0	0	0	0	2	0	0	0	3	0	0	1	0	0	0	0	3	0	0	0	7	1	0	2	0	0	0	0	1	0	0	3	0	0	0	0	0	0	1	0	1	0	0	7
0	0	0	0	1	0	0	0	0	0	3	0	0	0	2	0	0	0	1	0	0	0	3	0	0	0	6	0	0	0	1	0	0	0	0	0	0	0	1	0	0	0	0	0	0	1	0	0	2	5
0	0	0	0	1	1	0	0	0	0	1	0	0	0	3	0	0	0	0	1	0	0	6	0	1	0	6	0	0	1	0	0	0	1	0	0	0	1	0	0	0	0	0	0	0	0	0	1	0	1
0	0	0	0	1	0	0	0	0	0	1	0	0	0	0	0	0	0	0	0	0	0	2	0	0	0	11	0	0	0	0	0	0	0	0	0	0	1	0	0	0	0	0	0	0	0	1	0	0	6
0	0	0	0	3	0	0	0	0	0	2	0	0	0	1	0	0	0	0	0	0	1	1	0	0	0	6	0	0	1	0	0	0	0	0	0	1	1	0	0	0	0	0	2	0	0	0	0	1	5
0	0	1	0	1	0	0	0	1	0	2	1	0	0	3	1	0	1	0	1	0	2	8	0	0	1	10	1	1	1	0	0	0	0	0	0	0	3	0	0	0	0	0	1	0	0	0	0	1	8
0	0	0	0	0	0	0	0	0	0	6	0	0	0	4	0	0	2	0	1	1	1	9	0	0	0	8	0	0	3	3	0	0	0	2	0	1	3	2	0	0	0	0	1	1	4	3	0	0	15
0	0	1	0	3	0	1	0	2	0	8	0	1	0	1	0	0	0	1	2	0	1	9	0	1	0	11	1	3	5	0	0	0	0	0	2	0	2	0	0	0	0	0	1	1	0	0	1	1	16
0	0	0	0	0	0	0	0	0	1	3	0	3	0	1	0	0	0	0	0	0	0	3	0	0	0	9	0	0	5	1	0	0	0	1	0	0	3	0	0	0	0	0	0	1	0	0	0	0	7
1	0	1	0	0	0	1	0	0	0	5	0	0	0	6	0	0	1	0	2	0	1	11	0	4	0	25	2	0	4	1	0	0	0	1	0	0	3	0	0	0	0	0	0	1	1	1	0	4	16
0	1	1	0	1	1	1	0	0	0	6	1	1	0	1	0	1	0	0	2	0	3	9	0	0	0	14	0	1	2	0	0	0	0	0	0	0	2	0	0	0	0	0	1	0	0	1	0	2	10
0	3	0	0	2	0	1	2	0	0	4	0	1	0	6	0	0	0	0	0	0	0	9	0	0	1	18	0	0	3	0	0	0	0	2	1	1	3	0	0	0	0	0	1	0	0	0	0	3	21
0	0	1	0	2	1	0	2	1	0	5	0	1	0	6	1	0	1	2	1	1	0	14	0	0	0	14	2	1	5	2	0	0	2	2	1	1	4	0	1	1	0	0	0	0	2	1	0	4	17
1	1	1	1	4	5	2	2	1	0	15	0	0	0	10	0	0	3	1	1	0	0	42	1	1	0	135	3	0	7	1	1	2	0	4	2	0	8	3	1	0	0	0	8	2	2	5	0	5	64
0	0	5	2	10	5	1	0	1	2	21	1	2	0	14	2	3	1	1	1	0	3	37	0	2	0	71	2	1	7	2	0	2	0	3	1	2	9	2	1	1	0	0	4	2	0	5	0	3	56
2	0	3	0	2	4	0	0	1	3	16	0	4	0	16	2	2	2	2	2	0	2	45	2	0	2	66	1	0	11	5	0	1	1	2	6	2	12	3	0	0	1	0	3	3	1	6	1	2	71
0	0	1	1	4	2	1	2	2	1	13	0	1	1	4	0	0	0	0	2	0	4	29	1	3	0	57	1	1	12	2	1	1	2	2	5	1	9	1	1	1	1	0	5	1	2	5	1	4	52
1	2	1	1	1	2	0	0	0	0	10	0	3	1	4	2	1	3	0	1	0	4	34	0	1	0	36	0	0	5	2	1	0	1	0	0	1	4	1	0	0	0	0	3	3	0	1	1	3	45
0	1	2	0	2	2	0	1	1	2	5	1	2	0	8	2	2	3	1	1	2	5	49	1	3	0	59	3	1	20	2	0	0	2	3	2	3	4	1	2	1	0	0	5	2	7	4	1	1	54
0	0	2	2	2	1	0	0	0	1	13	0	2	0	4	0	0	3	0	2	0	1	34	1	0	0	30	2	2	7	1	0	0	0	2	1	1	9	0	1	0	0	0	1	1	2	5	2	6	20
0	0	1	0	3	2	0	2	0	0	17	0	0	1	5	3	1	3	1	4	0	0	27	1	1	0	25	1	1	5	2	0	0	3	3	0	0	3	1	0	0	0	1	1	0	2	0	0	2	69
0	0	0	1	2	0	0	0	0	0	6	1	2	0	9	1	1	2	1	1	0	0	27	0	1	0	27	0	0	5	4	0	1	0	1	4	2	4	1	0	0	0	1	4	1	0	2	0	0	37
0	1	1	1	2	1	1	0	0	0	5	2	1	0	4	1	1	0	0	0	1	1	23	1	0	0	20	1	1	7	4	1	0	0	1	1	1	1	0	0	1	1	0	4	1	0	3	3	3	31
0	0	0	2	0	2	0	1	0	1	5	2	1	0	5	1	0	1	1	2	0	1	28	0	1	1	27	1	0	3	0	0	1	0	1	1	1	3	0	1	0	0	0	4	1	0	1	1	4	27
1	1	4	1	0	6	3	1	1	0	8	0	4	0	6	0	0	0	0	0	0	0	23	0	1	0	25	1	1	4	2	0	0	3	1	4	0	2	2	0	0	0	0	5	2	1	2	0	1	20
1	3	1	0	2	3	0	0	0	1	10	0	0	2	5	1	0	3	3	1	0	0	22	0	0	0	21	2	1	11	3	0	2	0	2	1	0	8	0	0	0	0	0	8	0	3	1	1	0	38
0	0	0	1	1	1	1	0	1	2	12	2	1	0	3	1	0	1	6	1	0	1	29	0	0	0	27	1	0	9	1	0	0	0	2	1	0	6	0	0	0	2	0	3	0	1	2	1	2	32
1	0	0	1	3	5	0	0	0	2	4	1	0	0	4	3	1	2	0	0	0	0	10	0	0	0	31	1	2	3	1	0	0	0	2	1	0	6	0	0	1	0	1	3	0	1	3	0	2	28
0	2	4	0	1	1	1	1	0	1	15	2	1	1	3	1	0	3	1	0	0	1	22	3	1	0	25	0	0	8	0	0	0	0	3	2	1	7	0	0	0	0	0	3	1	3	5	0	2	21
2	3	2	0	5	0	0	1	0	2	12	2	1	1	6	1	0	4	0	1	0	1	15	0	1	0	37	0	1	7	1	0	0	0	2	0	0	5	1	0	0	0	0	4	1	1	0	0	3	46
0	4	2	0	5	1	1	0	0	0	10	1	0	1	10	0	0	3	1	3	0	0	29	0	1	0	38	1	0	8	0	0	0	1	0	2	0	8	0	1	0	1	0	5	0	1	3	1	6	34
1	1	2	2	2	1	1	0	0	0	8	0	0	0	7	3	0	3	2	1	0	1	23	1	0	0	36	1	0	12	4	0	0	0	2	3	0	9	0	0	1	1	0	3	1	0	3	1	3	41
0	1	4	0	3	3	4	0	0	0	8	0	3	1	3	3	0	1	1	2	0	4	28	1	2	0	33	0	1	8	2	0	0	1	0	1	0	3	3	0	1	0	0	4	1	2	2	0	3	37
0	1	2	0	2	5	0	1	2	0	6	3	3	1	10	0	1	2	1	2	0	1	30	2	0	0	55	1	0	21	4	1	0	2	4	3	1	11	1	0	0	0	1	2	0	3	2	0	2	49
1	0	2	0	7	4	1	0	1	1	8	2	3	0	10	3	2	5	1	4	0	2	34	0	2	0	45	3	0	5	6	1	0	1	3	2	1	6	1	0	0	0	0	3	2	4	5	0	4	30
0	4	4	0	5	3	0	0	0	1	13	0	1	0	5	0	0	0	0	0	1	1	18	0	0	0	33	3	0	7	1	0	0	1	1	0	2	4	1	0	0	1	0	2	1	3	3	2	0	20
0	1	0	0	6	2	1	0	0	2	24	0	2	3	2	0	0	1	2	2	1	0	26	1	0	1	23	5	2	9	1	0	0	0	2	1	1	5	1	0	0	0	0	4	0	2	3	1	5	22
0	1	4	0	6	4	0	2	0	0	18	0	0	1	6	0	0	1	0	0	0	2	30	1	0	0	23	1	0	5	2	0	0	0	2	0	2	4	1	1	0	0	0	3	0	0	1	1	5	32
1	0	2	1	0	2	0	0	0	1	5	2	0	0	6	1	0	2	0	1	0	0	18	0	2	0	27	0	0	5	0	1	0	0	1	0	0	2	1	0	2	0	0	3	0	0	2	0	2	21
0	0	0	0	1	1	1	0	0	0	7	1	0	0	5	0	1	0	0	3	0	1	27	0	0	2	16	1	2	8	1	1	0	0	5	0	0	11	0	0	1	0	1	4	0	1	2	1	5	27
0	2	0	0	1	3	0	0	0	0	4	0	0	0	7	2	1	0	0	1	0	0	19	1	0	0	24	1	1	4	0	0	0	1	0	1	0	6	0	0	0	0	1	0	1	0	2	0	2	18
0	0	0	1	2	0	0	0	0	0	8	0	0	0	4	1	0	1	0	0	0	1	13	1	0	0	14	1	0	4	1	1	0	0	1	2	1	3	0	0	1	0	0	0	1	2	3	0	2	25
0	0	2	0	1	1	1	0	0	0	4	0	0	0	0	0	1	0	0	0	0	2	13	0	0	1	23	1	0	7	0	1	0	1	0	4	1	6	0	0	0	0	0	2	0	0	2	2	1	23
0	0	2	0	2	1	1	0	0	1	5	1	0	1	4	1	0	1	0	1	0	3	28	1	0	0	20	1	0	5	1	1	0	0	0	1	0	3	0	0	1	1	0	4	1	2	2	0	0	18
1	1	3	2	6	0	0	0	0	1	7	3	1	1	3	0	1	5	1	1	0	8	42	0	0	0	33	1	0	6	0	0	0	1	1	0	0	8	0	0	0	0	0	7	2	5	4	1	5	36
0	3	2	0	2	2	0	1	0	2	8	0	0	0	4	1	0	1	1	2	1	1	32	0	0	1	28	0	0	5	0	1	0	0	1	4	2	2	0	0	0	0	0	4	0	2	4	1	1	43
0	1	2	0	4	2	5	2	0	1	12	2	0	0	11	0	2	4	0	2	1	3	29	0	1	0	29	1	2	7	1	0	0	1	1	2	1	6	0	0	0	0	0	5	0	1	1	2	4	53
1	0	1	1	4	5	1	1	2	1	15	3	2	0	9	0	0	2	4	2	0	5	28	3	2	0	41	2	0	11	1	0	1	2	1	5	0	8	0	2	0	0	0	6	3	2	5	1	4	68
0	0	3	2	5	1	0	0	2	4	16	1	3	1	11	2	1	2	1	2	0	2	44	1	1	1	58	2	0	8	5	1	1	0	1	7	1	8	0	1	0	0	0	1	3	2	4	2	3	44
0	3	1	0	5	4	0	2	1	1	13	8	3	0	4	3	1	2	0	2	0	4	50	0	0	0	41	3	2	5	1	0	1	1	1	2	1	4	1	0	0	3	0	3	1	0	3	0	5	42
0	0	1	0	3	1	1	1	2	1	5	0	0	0	4	0	0	6	2	3	1	1	32	0	0	0	25	4	0	4	3	0	0	1	1	2	0	5	3	0	1	1	1	6	2	3	3	1	0	36
0	2	4	0	3	3	1	0	0	0	13	1	2	0	5	1	1	5	3	3	0	0	31	2	1	0	33	2	2	13	0	0	1	1	2	1	0	4	0	0	0	0	0	5	0	2	4	2	3	38
0	1	3	0	4	5	1	1	1	2	12	1	2	0	5	2	0	2	3	3	0	5	44	0	0	0	42	2	1	11	3	0	0	2	1	4	0	5	1	0	0	0	1	7	0	0	2	0	4	53
0	1	4	0	1	4	0	1	2	4	13	2	1	3	5	4	0	3	3	1	0	3	40	0	0	0	57	1	0	11	3	3	0	1	2	3	2	5	1	0	0	2	0	4	0	2	6	2	4	48
0	1	2	1	2	6	2	1	0	0	11	0	1	1	4	1	1	5	1	3	0	3	40	0	1	0	40	1	0	10	7	2	0	1	4	2	2	4	0	0	1	0	0	3	1	3	5	1	3	45
1	1	2	0	0	3	2	1	0	0	5	0	1	1	4	0	1	2	2	1	0	0	32	1	1	0	33	0	0	8	4	0	0	0	1	1	2	6	0	0	1	0	0	6	0	2	3	1	3	46
0	2	3	2	4	1	1	1	0	1	18	0	3	2	8	1	0	2	1	4	1	1	36	0	1	0	41	0	2	10	2	0	1	2	2	3	1	5	3	0	1	1	0	7	0	2	5	2	5	49
1	3	2	1	5	4	1	2	0	0	13	1	0	1	6	3	0	5	2	3	1	2	47	3	2	0	47	1	0	13	2	1	1	0	7	7	1	8	3	1	1	1	0	5	4	2	4	1	6	58
0	2	1	1	6	3	3	2	0	2	15	3	2	3	5	1	2	4	2	4	2	2	49	1	0	1	49	2	1	9	2	0	0	0	4	3	4	7	0	1	1	1	0	12	4	2	1	1	3	46
1	3	2	0	7	4	2	1	0	2	21	4	3	1	8	2	1	6	1	5	2	2	69	2	1	0	78	2	4	14	5	0	0	2	1	2	2	6	2	0	0	2	3	6	1	4	5	2	4	71
0	1	4	0	5	6	4	2	0	1	24	1	4	0	12	2	0	6	1	2	1	3	57	3	1	0	61	2	2	8	2	2	0	2	4	2	5	14	2	1	1	2	1	21	3	3	7	4	10	58
0	3	3	2	6	3	1	3	0	2	38	1	6	3	12	3	0	2	3	6	0	5	75	7	2	1	64	5	2	10	5	0	0	2	4	5	1	12	3	2	2	0	1	9	0	3	3	1	11	68
1	0	3	1	10	5	2	1	2	0	24	1	7	2	18	0	0	3	1	4	0	7	61	0	3	4	45	3	1	20	10	0	1	1	2	2	2	25	4	0	1	2	0	13	1	2	3	3	10	71
1	6	4	0	12	3	3	4	0	4	28	4	7	2	7	4	1	6	1	3	2	6	96	3	5	0	97	1	1	20	3	1	0	1	3	3	3	9	0	0	2	1	0	14	0	6	5	4	8	73
1	6	7	2	7	8	2	0	0	0	20	3	2	2	18	3	1	2	7	2	0	5	90	1	4	2	109	3	2	11	7	1	0	1	2	5	2	15	3	1	0	0	0	10	3	2	3	1	10	79
0	3	10	1	6	8	3	1	1	3	47	4	4	2	24	6	3	4	0	7	4	8	93	5	0	3	268	3	5	34	8	1	0	1	3	8	4	18	2	1	1	1	1	19	4	2	8	2	12	137
2	2	6	2	9	8	5	1	1	4	35	6	4	2	13	7	5	13	2	12	2	9	117	5	2	0	208	5	7	26	7	0	0	1	6	5	6	15	2	0	5	1	1	10	3	7	11	2	12	138
2	8	11	0	9	11	2	3	2	5	40	6	9	2	16	4	2	12	3	7	1	8	153	2	2	1	171	7	4	33	3	2	1	3	9	4	8	14	3	0	2	1	1	23	6	8	13	2	13	159
2	6	11	1	19	16	3	4	1	4	51	6	20	4	17	4	3	10	6	9	3	12	150	5	7	3	182	6	5	47	7	0	0	3	8	7	4	23	6	5	1	0	1	24	7	11	15	3	14	193
0	2	6	1	14	11	2	4	2	3	45	4	9	3	26	3	6	6	3	6	3	9	155	3	1	5	126	5	6	35	6	1	0	9	7	2	4	24	9	3	1	1	0	27	15	5	10	3	11	160
4	8	11	2	13	7	3	4	5	1	57	6	11	3	29	2	4	16	5	10	3	10	173	3	5	1	142	5	6	47	14	0	4	1	6	6	0	16	4	0	1	0	0	26	6	6	11	11	9	173
1	11	11	0	13	14	5	5	2	7	70	10	14	8	33	3	2	11	8	9	2	7	185	3	8	1	181	8	4	38	16	3	4	4	18	13	10	25	8	5	0	3	4	38	7	3	13	1	14	160
2	11	15	1	22	14	8	13	4	10	88	11	16	9	37	6	6	17	4	17	8	10	254	2	4	4	247	12	7	74	23	2	3	6	12	16	6	41	5	2	2	3	7	45	10	10	20	9	28	298
4	5	10	1	16	7	2	5	6	5	60	9	15	2	22	3	5	11	6	15	4	11	191	18	7	5	209	10	4	57	12	3	1	4	11	8	5	29	6	1	2	0	1	40	7	3	12	4	18	216
2	12	6	2	22	14	3	2	2	3	75	6	10	2	23	6	1	13	3	13	12	14	186	7	0	5	175	6	3	45	12	5	2	6	13	10	6	25	6	5	8	2	1	29	4	13	20	2	17	164
3	6	10	0	17	15	6	5	1	9	80	11	5	5	20	6	5	13	2	14	6	7	178	6	2	7	164	10	6	45	17	4	1	5	6	10	5	19	3	2	3	3	2	25	3	8	16	6	12	180
2	8	13	2	10	10	4	3	1	4	71	8	11	2	21	8	5	12	4	7	8	9	181	4	4	5	129	9	5	45	7	5	2	5	7	7	4	17	3	5	2	3	0	24	7	4	10	6	13	178
1	3	10	1	13	10	0	3	3	6	72	6	4	4	16	7	2	7	4	7	6	4	186	3	4	2	155	9	6	44	11	2	1	8	11	12	6	20	1	1	1	2	2	24	1	5	10	3	11	189
2	7	7	2	20	9	3	9	8	4	71	10	10	3	20	3	4	13	8	12	2	9	223	5	3	2	192	5	7	54	19	0	1	6	3	9	10	15	3	1	5	6	4	31	9	4	12	7	19	199
4	6	10	4	8	13	2	1	3	1	73	7	7	2	20	5	4	6	4	12	3	4	175	7	3	3	165	11	5	55	17	4	2	5	8	5	10	12	5	1	0	2	2	34	5	4	15	4	19	150
2	9	9	4	15	19	5	3	4	4	62	6	9	3	19	6	3	14	3	7	2	5	152	7	9	3	208	10	5	52	13	2	1	8	4	7	9	18	6	2	3	4	6	30	9	6	16	8	16	146
2	5	10	0	11	10	4	5	7	5	54	5	7	0	19	7	6	5	4	14	1	3	178	4	4	3	119	9	6	29	5	1	5	5	11	5	5	18	5	0	4	1	2	27	8	4	11	10	15	195
3	6	9	1	11	12	4	2	4	8	55	10	6	3	13	4	2	4	5	13	3	1	159	7	2	4	128	3	4	43	7	0	2	0	8	4	2	11	2	1	1	2	1	13	4	7	12	4	13	128
3	6	5	2	27	10	5	5	3	11	66	8	12	2	32	2	4	14	4	13	3	12	240	7	9	2	204	13	17	50	23	2	2	6	9	10	4	25	7	4	4	3	1	30	8	11	13	4	23	184
1	9	11	3	25	11	4	4	1	3	80	12	8	6	23	3	3	22	3	18	3	4	232	5	8	5	231	11	7	49	14	1	1	6	9	7	3	18	9	3	1	6	5	38	4	8	26	7	23	228
4	14	17	0	17	31	9	5	10	6	84	12	11	2	39	9	5	27	9	28	1	16	323	6	5	7	216	6	4	56	15	2	4	6	11	11	3	20	9	2	5	4	4	29	6	7	22	7	24	258
1	23	7	4	18	22	6	8	6	3	114	3	11	2	35	6	5	9	7	9	5	8	268	4	7	3	296	16	4	50	12	1	3	9	11	9	6	20	4	2	10	5	2	39	4	9	14	5	14	179
3	9	13	5	12	21	4	5	5	1	83	7	10	2	30	10	6	18	6	18	1	14	239	4	14	3	235	8	9	47	18	3	3	8	7	11	3	23	4	3	5	3	4	37	7	8	17	11	15	196
5	13	11	3	19	13	4	5	3	3	83	11	11	6	23	3	5	15	6	13	5	13	267	7	8	6	191	12	14	52	12	7	2	9	5	7	4	24	5	3	3	3	2	31	7	7	14	4	23	203
5	8	21	5	22	18	3	10	4	2	100	12	24	4	20	10	3	19	15	23	3	14	270	14	10	5	198	11	6	63	21	5	1	11	8	6	8	24	4	5	5	3	1	39	6	10	17	6	33	214
3	9	6	4	34	18	4	9	8	1	102	6	8	3	21	9	2	20	10	19	3	11	229	3	12	6	206	9	2	81	25	5	2	14	11	8	7	13	2	3	5	3	6	32	7	10	20	4	20	175
5	17	13	5	25	23	8	1	7	7	110	9	5	3	28	6	4	19	4	23	9	11	305	19	15	5	239	11	10	73	15	5	4	0	10	9	8	19	8	3	6	1	6	37	5	13	28	6	21	257
3	12	19	2	25	15	5	1	4	6	74	13	9	4	30	10	3	20	18	17	11	12	302	15	6	5	294	12	8	76	27	3	5	2	12	10	8	24	7	3	2	3	4	45	9	14	21	7	22	224
5	18	17	3	30	24	11	14	8	10	114	10	11	5	25	6	6	27	7	27	14	14	329	27	18	3	273	9	6	77	18	5	3	6	14	10	14	22	6	7	3	4	5	54	7	12	14	8	19	265
3	12	19	2	26	26	12	7	8	9	104	8	12	2	35	10	8	18	5	17	10	16	428	3	17	4	256	7	6	81	11	4	2	3	11	18	12	22	11	2	4	3	4	55	9	20	30	8	33	221
1	14	16	3	26	21	5	6	11	5	107	13	10	4	26	7	4	16	5	20	10	14	339	8	8	4	216	11	6	78	15	3	0	7	8	13	8	16	6	3	4	3	2	44	11	12	19	4	30	227
1	12	18	3	25	18	6	4	8	10	138	16	10	6	26	3	9	22	8	24	7	21	302	5	9	5	257	5	5	69	14	4	2	6	12	13	10	21	7	4	8	2	4	38	4	14	25	7	30	228
3	14	13	6	33	21	8	11	2	14	133	15	15	1	43	13	3	19	10	24	10	17	345	5	10	6	305	12	14	98	20	7	5	10	13	9	10	32	3	5	8	7	3	61	13	11	24	8	28	272
3	20	15	4	27	21	7	14	10	17	113	11	11	4	34	8	7	26	7	13	12	24	362	4	16	7	247	9	16	84	20	5	7	10	12	16	11	38	5	4	10	4	2	53	3	9	18	7	59	290
7	9	17	1	29	25	7	8	4	6	118	13	23	7	33	15	4	22	9	22	6	14	353	2	11	9	281	17	14	149	27	6	2	9	18	13	16	33	10	2	2	3	3	42	7	14	24	9	34	317
8	17	24	3	35	20	12	7	7	4	144	15	16	2	48	13	1	25	6	25	4	25	378	7	24	3	317	13	15	102	37	4	7	10	9	19	11	39	11	5	6	2	9	54	10	11	21	4	47	366
7	17	11	3	29	37	7	11	3	13	115	16	18	12	40	15	7	25	13	17	7	24	364	6	17	5	249	9	6	89	29	10	4	7	15	19	13	42	4	10	3	1	0	63	13	13	24	9	33	301
9	11	19	5	33	26	13	8	6	8	122	12	18	6	53	8	4	25	12	25	5	23	463	6	25	8	316	18	13	126	36	8	2	5	22	17	10	36	10	3	8	1	2	61	6	13	21	13	32	394
2	15	22	4	28	28	6	7	7	16	123	13	17	4	28	10	1	32	8	16	6	13	403	6	9	7	266	21	21	104	30	11	4	7	15	15	11	36	6	6	9	3	3	53	11	13	29	15	28	376
11	15	26	7	52	44	7	10	11	13	196	16	31	4	50	15	12	33	12	25	8	23	480	9	15	5	344	30	18	139	27	4	2	7	22	25	13	62	11	1	8	1	7	68	21	17	40	15	51	456
6	19	30	7	38	40	15	6	5	12	159	14	18	7	48	17	10	22	7	25	3	27	477	12	7	7	351	21	21	125	32	6	1	7	18	15	19	44	11	3	4	6	5	65	8	12	21	12	31	341
5	11	29	6	28	25	10	9	6	11	140	16	34	5	47	5	9	23	16	24	9	10	407	8	17	11	299	27	13	105	32	5	6	17	23	23	20	40	4	5	10	3	1	67	13	10	30	7	41	347
6	11	17	6	43	22	10	8	9	14	93	23	25	6	32	13	7	29	7	26	4	15	351	7	8	12	244	15	20	102	35	8	2	6	20	19	24	19	6	10	9	7	3	65	4	12	24	16	43	280
7	16	27	6	53	31	14	8	16	8	163	17	29	6	55	27	9	40	13	30	7	16	486	9	16	9	367	26	16	143	44	10	3	14	19	25	13	39	10	7	13	7	12	74	5	11	43	17	56	451
7	45	34	8	69	41	17	11	8	11	240	20	21	13	70	28	1	44	9	31	13	38	599	30	20	12	465	18	17	173	57	10	6	17	19	27	11	56	18	17	13	6	5	127	11	33	51	14	69	590
9	39	48	6	56	47	11	10	9	19	243	25	35	14	77	32	6	43	12	54	7	32	698	18	21	13	523	37	12	213	49	13	12	14	21	21	34	56	16	9	8	10	10	125	15	38	52	18	83	643
10	31	44	12	81	42	8	18	15	17	280	27	38	9	59	24	17	85	17	58	20	42	796	21	33	8	627	34	23	233	67	19	9	14	29	33	23	42	19	12	15	11	9	218	20	28	53	14	90	684
14	46	54	11	69	55	35	13	15	18	341	37	72	10	79	23	14	80	16	55	18	46	804	25	26	15	641	30	24	218	72	20	5	16	33	29	24	49	14	8	23	4	6	259	17	27	65	16	96	700
8	32	66	13	78	66	22	21	23	19	298	40	62	9	83	35	11	123	13	55	18	42	943	22	21	19	670	39	30	198	85	19	9	12	27	40	26	60	22	13	11	7	10	507	23	34	53	28	105	763
18	35	61	26	82	70	39	23	24	24	324	40	68	14	125	33	21	100	21	61	16	66	1028	34	29	26	1000	45	43	286	106	21	10	24	30	41	35	117	24	12	19	11	8	425	26	34	62	22	111	928
19	62	91	16	128	90	37	39	36	23	449	50	69	22	124	48	26	121	19	64	29	74	1558	29	43	26	1118	45	50	409	124	26	10	22	48	54	36	118	21	13	27	17	15	376	30	43	77	41	123	1219
24	72	115	35	175	105	47	39	53	40	573	89	90	13	169	62	30	158	37	126	27	55	1912	34	63	30	1383	75	60	545	180	30	10	39	49	53	40	119	48	32	33	31	29	429	48	57	100	49	143	1532
29	77	131	32	144	113	57	45	59	38	572	98	93	19	188	63	41	171	50	115	32	73	1918	35	78	37	1468	76	64	547	166	29	25	27	78	74	50	144	29	36	41	26	31	505	40	69	82	62	172	1619
63	123	183	30	271	128	74	48	66	36	860	106	98	29	248	69	49	266	32	150	48	93	2650	65	128	54	2150	111	92	829	286	47	34	50	73	100	58	168	30	47	63	46	50	531	52	81	115	75	228	2106
52	127	169	37	292	134	75	47	95	39	810	103	141	32	234	88	48	252	44	111	29	140	2782	55	95	44	1652	95	127	821	257	53	39	36	74	85	64	162	48	45	60	36	33	506	47	69	140	93	204	2189
58	128	154	45	329	128	75	61	128	56	868	116	188	29	235	97	39	264	62	129	40	160	3457	82	125	61	1848	129	101	954	277	55	49	61	55	67	54	135	40	40	69	47	51	653	57	72	149	79	240	2388
56	128	133	45	260	113	85	57	105	46	827	115	104	22	225	65	34	267	50	153	43	120	2940	75	148	67	1466	106	110	835	231	54	38	44	71	89	49	149	29	45	56	32	38	595	38	89	114	96	191	2200
63	134	141	56	298	114	81	37	73	48	780	134	99	46	192	79	27	282	42	117	51	136	2848	71	137	68	1397	114	139	971	249	62	62	53	68	88	62	158	39	42	65	53	46	580	63	79	114	60	196	2105
80	146	221	52	466	195	125	69	152	54	1125	182	183	46	234	105	49	491	62	181	51	150	4149	106	191	114	1913	183	207	1148	441	73	84	63	103	130	105	165	49	68	102	69	89	683	60	77	157	106	234	2617
63	126	131	39	324	144	78	65	110	40	900	178	145	56	179	83	39	331	54	150	41	129	3123	71	180	71	1579	142	136	919	350	51	63	57	62	105	80	136	42	51	73	42	62	591	53	59	137	73	191	2103
45	130	124	38	272	119	87	48	65	39	789	121	82	38	151	65	33	258	42	117	38	121	2694	64	132	58	1185	111	130	871	377	37	54	39	54	89	85	132	28	48	54	36	54	530	45	79	118	54	201	1766
43	74	108	39	207	112	66	43	72	24	581	127	78	27	137	52	22	210	26	101	37	87	2169	41	116	43	988	82	130	602	223	22	30	40	42	47	47	104	26	36	61	28	37	432	31	50	75	60	142	1325
33	81	106	42	187	81	48	41	56	24	606	108	82	32	125	62	36	195	29	105	25	72	2152	37	97	42	954	72	87	596	251	23	37	30	59	66	45	108	25	31	42	33	35	536	29	43	84	47	114	1260
33	71	72	29	195	69	47	36	70	27	533	115	71	21	113	55	25	166	19	92	19	91	1945	46	103	42	788	72	79	480	215	30	29	35	50	39	37	79	14	33	42	25	21	418	29	53	67	48	106	1032
29	71	94	39	154	97	39	33	52	27	465	76	74	26	100	45	28	166	21	78	18	53	1738	38	78	30	727	66	70	513	189	18	28	24	49	53	45	66	26	26	42	29	24	386	16	30	75	47	111	1115
30	72	98	37	189	89	61	40	74	19	583	93	92	26	131	63	36	203	23	88	24	77	2010	38	107	40	844	79	102	575	181	17	40	29	40	59	37	96	29	31	42	37	54	448	21	38	76	38	142	1220
49	79	111	38	196	103	58	30	63	16	550	94	78	16	101	47	24	200	31	102	13	75	1902	34	122	42	849	77	112	569	205	24	45	34	59	57	46	101	20	32	43	23	40	442	27	33	93	45	135	1346
44	90	131	39	237	145	69	43	63	32	590	121	79	23	141	64	29	211	65	107	15	90	2175	36	140	42	952	93	103	681	223	47	57	38	69	43	47	117	37	39	71	32	41	469	35	74	95	48	144	1650
41	95	91	47	209	99	76	43	62	14	619	135	101	28	110	48	27	214	52	87	18	67	2030	40	109	49	898	82	118	609	318	26	59	33	45	70	34	114	29	37	40	22	48	550	21	35	89	55	127	1365
34	77	83	34	196	78	41	40	57	20	472	92	69	25	82	41	19	167	48	78	22	61	1674	27	97	34	736	98	89	520	193	29	50	12	37	51	36	77	21	32	35	29	32	382	28	45	41	45	93	1084
36	75	90	41	159	87	42	32	63	18	511	87	91	30	130	58	22	182	40	73	23	60	1750	28	115	36	743	65	85	529	157	20	46	41	47	45	25	78	28	18	48	26	31	365	19	38	66	28	124	1047
33	55	76	34	182	79	39	36	61	27	436	95	82	29	96	29	25	155	63	72	14	54	1689	33	89	38	661	69	79	477	180	23	48	27	37	42	32	79	18	30	36	18	24	374	18	44	49	51	109	992
31	54	74	29	150	90	44	32	60	17	469	67	73	18	98	38	20	156	31	54	15	74	1558	33	78	39	733	79	72	507	140	25	44	28	36	37	33	81	17	28	40	23	28	315	20	29	69	27	78	995
27	52	61	29	211	71	35	32	59	7	492	94	68	22	97	31	23	135	96	61	8	48	1510	34	94	36	715	52	53	518	140	14	31	26	35	35	25	70	18	31	45	28	25	301	12	28	53	35	93	993
18	43	56	27	127	59	43	26	40	10	370	68	53	16	68	28	19	113	26	61	15	45	1270	29	66	27	545	60	86	461	119	22	22	25	31	39	21	51	18	27	35	18	13	263	18	32	50	23	82	855
33	63	68	38	184	75	44	24	51	16	346	87	61	20	74	49	17	144	20	55	16	44	1284	20	68	21	538	61	81	456	124	17	33	22	30	34	26	64	28	29	39	20	30	268	19	26	55	35	73	868
19	51	66	29	104	65	33	24	55	16	340	61	50	21	69	42	15	105	28	66	12	59	1131	22	84	20	537	44	72	403	122	16	39	23	30	23	26	58	21	19	41	14	23	247	32	19	54	24	70	771
0	0	0	0	0	0	0	0	0	0	0	0	0	0	0	0	0	0	0	0	0	0	0	0	0	0	0	0	0	0	0	0	0	0	0	0	0	0	0	0	0	0	0	0	0	0	0	0	0	0
[truncated: 206 more columns]
